# Supplementary material for: Magnetic resonance imaging findings in Ghanaian patients presenting with low back pain: A single centre study
Source: Research Square preprint supplement (doi:10.21203/rs.3.rs-5898112/v1), 2025-02-04
Supplement: Supplementary file 1 [file ad3eebcff50413bca912b1f1.docx]

**Sample MRI radiologist report of the lumbar spine with a history of lower back pain**


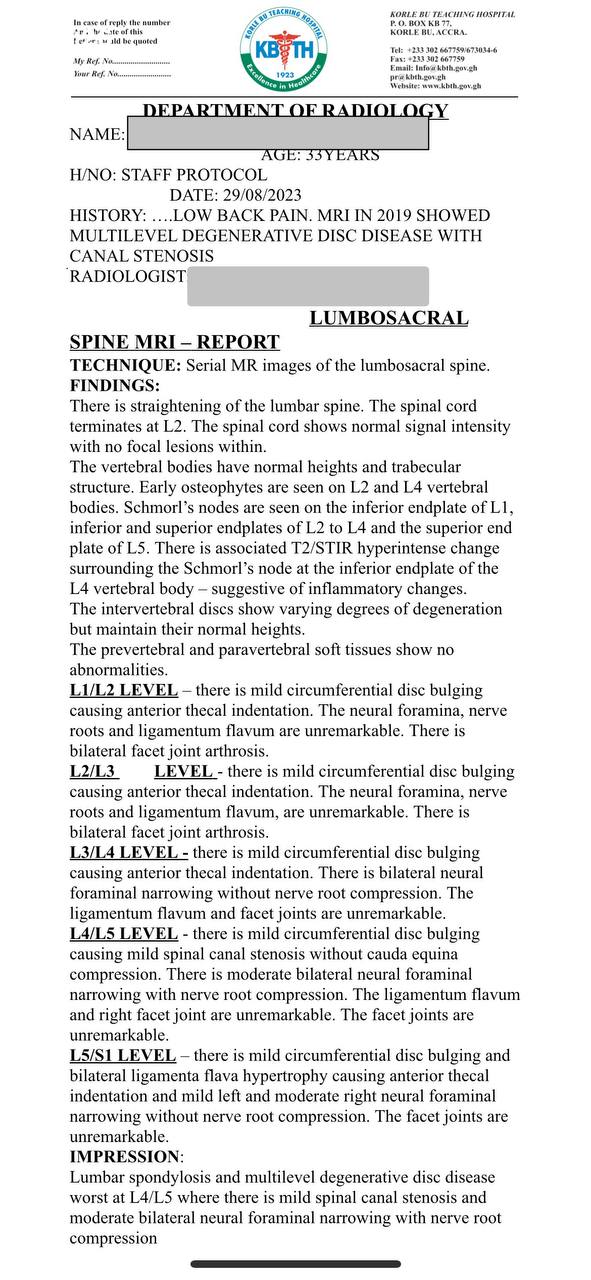


**Data collection sheet**

| **Gender** | **Age** | **Main findings** | **Disc space** | **Pathologies associated** | **Vertebral body** | **Pathologies associated** | **Lordotic curvature** | **Spinal cord termination** |
| --- | --- | --- | --- | --- | --- | --- | --- | --- |
|  |  |  |  |  |  |  |  |  |
|  |  |  |  |  |  |  |  |  |
|  |  |  |  |  |  |  |  |  |
|  |  |  |  |  |  |  |  |  |
|  |  |  |  |  |  |  |  |  |
|  |  |  |  |  |  |  |  |  |
|  |  |  |  |  |  |  |  |  |
|  |  |  |  |  |  |  |  |  |
|  |  |  |  |  |  |  |  |  |
|  |  |  |  |  |  |  |  |  |
